# Supplementary material for: The Cytogenomic “Theory of Everything”: Chromohelkosis May Underlie Chromosomal Instability and Mosaicism in Disease and Aging
Source: PubMed Central journal article supplement (PMC7664247; doi:10.3390/ijms21218328), 2020-11-06
Supplement: ijms-21-08328-s001.pdf [file ijms-21-08328-s001.pdf]

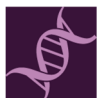

Article

# The Cytogenomic “Theory of Everything”: Chromohelkosis May Underlie Chromosomal Instability and Mosaicism in Disease and Aging

Ivan Y. Iourov <sup>1,2,3,\*</sup>, Svetlana G. Vorsanova <sup>1,2</sup>, Yuri B. Yurov <sup>1,2</sup>, Maria A. Zelenova <sup>1,2</sup>, Oxana S. Kurinnaia <sup>1,2</sup>, Kirill S. Vasin <sup>1,2</sup> and Sergei I. Kutsev <sup>4</sup>

<sup>1</sup> Mental Health Research Center, Moscow 117152, Russia; ivan.iourov@gmail.com (I.Y.I.); svorsanova@mail.ru (S.G.V.); y\_yurov@yahoo.com (Y.B.Y.); maria\_zelenova@yahoo.com (M.A.Z.); kurinnaiaos@mail.ru (O.S.K.); vasin-ks@rambler.ru (K.S.V.)

<sup>2</sup> Veltischev Research and Clinical Institute for Pediatrics of the Pirogov Russian National Research Medical University, Ministry of Health of Russian Federation, Moscow 125412, Russia;

<sup>3</sup> Department of Medical Biological Disciplines, Belgorod State University, Belgorod 308015, Russia;

<sup>4</sup> Research Centre for Medical Genetics, Moscow 115522, Russia; kutsev@mail.ru

\* Correspondence: ivan.iourov@gmail.com

Received: 22 October 2020; Accepted: 4 November 2020; Published: date

**Supplementary Table 1.** Disease-associated genes located between breakpoints of mosaic and regular chromosome imbalances (CNV).

| Chromosomal Localization (Mosaic) | Genes Located between Proximal Breakpoints | Genes Located between Distal Breakpoints                                                                                                                                                                                                                                                                                                                                                                                                                                                                                                                                                                                                                                                                                           |
|-----------------------------------|--------------------------------------------|------------------------------------------------------------------------------------------------------------------------------------------------------------------------------------------------------------------------------------------------------------------------------------------------------------------------------------------------------------------------------------------------------------------------------------------------------------------------------------------------------------------------------------------------------------------------------------------------------------------------------------------------------------------------------------------------------------------------------------|
| 1p36.33p36.32                     | —                                          | <i>ISG15</i> [OMIM:147571] (immunodeficiency 38 [OMIM:616126]), <i>AGRN</i> [OMIM:103320] (myasthenic syndrome, congenital, 8, with pre- and postsynaptic defects [OMIM:615120]), <i>TNFRSF4</i> [OMIM:600315] (immunodeficiency 16 [OMIM:615593]), <i>B3GALT6</i> [OMIM:615291] (Ehlers-Danlos syndrome, progeroid type, 2 [OMIM:615349], spondyloepimetaphyseal dysplasia with joint laxity, type 1, with or without fractures [OMIM:271640]), <i>DVL1</i> [OMIM:601365] (Robinow syndrome, autosomal dominant 2 [OMIM:616331]), <i>TMEM240</i> [OMIM:616101] (spinocerebellar ataxia 21 [OMIM:607454]), <i>GABRD</i> [OMIM:137163] (epilepsy, generalized, with febrile seizures plus, type 5, susceptibility to [OMIM:613060], |

|               |                                                                                                                                                                                                                                                                                                                                                                                                                                                                                                                                                                                                                                                                                                                                                                                                                                                                                                  |                                                                                                                                                                                                                                                                                                                                                          |
|---------------|--------------------------------------------------------------------------------------------------------------------------------------------------------------------------------------------------------------------------------------------------------------------------------------------------------------------------------------------------------------------------------------------------------------------------------------------------------------------------------------------------------------------------------------------------------------------------------------------------------------------------------------------------------------------------------------------------------------------------------------------------------------------------------------------------------------------------------------------------------------------------------------------------|----------------------------------------------------------------------------------------------------------------------------------------------------------------------------------------------------------------------------------------------------------------------------------------------------------------------------------------------------------|
|               |                                                                                                                                                                                                                                                                                                                                                                                                                                                                                                                                                                                                                                                                                                                                                                                                                                                                                                  | epilepsy, idiopathic generalized, 10 [OMIM:613060], epilepsy, juvenile myoclonic, susceptibility to [OMIM:613060]), <i>SKI</i> [OMIM:164780] (Shprintzen-Goldberg syndrome [OMIM:182212]), <i>PEX10</i> [OMIM:602859] (peroxisome biogenesis disorder 6A (Zellweger) [OMIM:614870], Peroxisome biogenesis disorder 6B [OMIM:614871])                     |
| 1p36.33p36.32 | <i>TAS1R3</i> [OMIM:605865], <i>DVL1</i> [OMIM:601365] (Robinow syndrome, autosomal dominant 2 [OMIM:616331]), <i>TMEM240</i> [OMIM:616101] (spinocerebellar ataxia 21 [OMIM:607454]), <i>GABRD</i> [OMIM:137163] (epilepsy, generalized, with febrile seizures plus, type 5, susceptibility to [OMIM:613060], epilepsy, idiopathic generalized, 10 [OMIM:613060], epilepsy, juvenile myoclonic, susceptibility to [OMIM:613060]), <i>SKI</i> [OMIM:164780] (Shprintzen-Goldberg syndrome [OMIM:182212]), <i>PEX10</i> [OMIM:602859] (peroxisome biogenesis disorder 6A (Zellweger) [OMIM:614870], peroxisome biogenesis disorder 6B [OMIM:614871]), <i>PRDM16</i> [OMIM:605557] (cardiomyopathy, dilated, <i>1LL</i> [OMIM:615373], left ventricular noncompaction 8 [OMIM:615373]), <i>TP73</i> [OMIM:601990] (neuroblastoma), <i>CEP104</i> [OMIM:616690] (Joubert syndrome 25 [OMIM:616781]) | <i>ISG15</i> [OMIM:147571] (immunodeficiency 38 [OMIM:616126]), <i>AGRN</i> [OMIM:103320] (myasthenic syndrome, congenital, 8, with pre- and postsynaptic defects [OMIM:615120])                                                                                                                                                                         |
| 2p25.3        | <i>MYT1L</i> [OMIM:613084] (mental retardation, autosomal dominant 39 [OMIM:616521])                                                                                                                                                                                                                                                                                                                                                                                                                                                                                                                                                                                                                                                                                                                                                                                                             | <i>TPO</i> [OMIM:606765] (thyroid dysmorphogenesis 2A [OMIM:274500])<br><i>NEB</i> [OMIM:161650] (nemaline myopathy 2, autosomal recessive), <i>CACNB4</i> [OMIM:601949] (episodic ataxia, type 5 [OMIM:613855], epilepsy, idiopathic generalized, susceptibility to, 9 [OMIM:607682], epilepsy, juvenile myoclonic, susceptibility to, 6 [OMIM:607682]) |
| 2q22.2q24.1   | <i>ZEB2</i> [OMIM:605802] (Mowat-Wilson syndrome [OMIM: 235730]), <i>ORC4</i> [OMIM:603056] (Meier-Gorlin syndrome 2 [OMIM:613800]), <i>MBD5</i> [OMIM:611472] (mental retardation, autosomal dominant 1 [OMIM:156200])                                                                                                                                                                                                                                                                                                                                                                                                                                                                                                                                                                                                                                                                          | <i>NEB</i> [OMIM:161650] (nemaline myopathy 2, autosomal recessive [OMIM:256030]),                                                                                                                                                                                                                                                                       |
| 2q22.2q24.1   | <i>KYNU</i> [OMIM:605197] (hydroxykynureninuria [OMIM:236800]), <i>ZEB2</i> [OMIM:605802] (Mowat-Wilson                                                                                                                                                                                                                                                                                                                                                                                                                                                                                                                                                                                                                                                                                                                                                                                          |                                                                                                                                                                                                                                                                                                                                                          |

|              |                                                                                                                                                                                                                                                                                                                                                                                                                                                                                                                                                                                                                                    |                                                                                                                                                                                                                                                                                                                                                                                                                                                                                                                                                                                                             |
|--------------|------------------------------------------------------------------------------------------------------------------------------------------------------------------------------------------------------------------------------------------------------------------------------------------------------------------------------------------------------------------------------------------------------------------------------------------------------------------------------------------------------------------------------------------------------------------------------------------------------------------------------------|-------------------------------------------------------------------------------------------------------------------------------------------------------------------------------------------------------------------------------------------------------------------------------------------------------------------------------------------------------------------------------------------------------------------------------------------------------------------------------------------------------------------------------------------------------------------------------------------------------------|
|              | syndrome [OMIM:235730]), <i>ORC4</i> [OMIM:603056] (Meier-Gorlin syndrome 2 [OMIM:613800]), <i>MBD5</i> [OMIM:611472] (Mental retardation, autosomal dominant 1 [OMIM:156200])                                                                                                                                                                                                                                                                                                                                                                                                                                                     | <i>CACNB4</i> [OMIM:601949] (episodic ataxia, type 5 [OMIM:613855], epilepsy, idiopathic generalized, susceptibility to, 9 [OMIM:607682], epilepsy, juvenile myoclonic, susceptibility to, 6 [OMIM:607682])                                                                                                                                                                                                                                                                                                                                                                                                 |
| 3p26.3p26.1  | <i>SUMF1</i> [OMIM:607939] (multiple sulfatase deficiency [OMIM:272200]), <i>ITPR1</i> [OMIM:147265] (gillespie syndrome [OMIM:206700], spinocerebellar ataxia 15 [OMIM:606658], spinocerebellar ataxia 29, congenital nonprogressive [OMIM:117360])                                                                                                                                                                                                                                                                                                                                                                               | —                                                                                                                                                                                                                                                                                                                                                                                                                                                                                                                                                                                                           |
| 3p26.3p26.1  | —                                                                                                                                                                                                                                                                                                                                                                                                                                                                                                                                                                                                                                  | <i>CRBN</i> [OMIM:609262] (mental retardation, autosomal recessive 2 [OMIM:607417])                                                                                                                                                                                                                                                                                                                                                                                                                                                                                                                         |
| 3q26.1q26.31 | <i>PDCD10</i> [OMIM:609118] (cerebral cavernous malformations 3 [OMIM:603285]), <i>SERPINI1</i> [OMIM:602445] (encephalopathy, familial, with neuroserpin inclusion bodies [OMIM:604218]), <i>MECOM</i> [OMIM:165215] (radioulnar synostosis with amegakaryocytic thrombocytopenia 2 [OMIM:616738]), <i>TERC</i> [OMIM:602322] (dyskeratosis congenita, autosomal dominant 1 [OMIM: 127550], aplastic anemia [OMIM:614743], pulmonary fibrosis, idiopathic, susceptibility to) [OMIM:614743], <i>SLC7A14</i> [OMIM:615720] (retinitis pigmentosa 68 [OMIM:615725])                                                                 | <i>GHSR</i> [OMIM:601898] (growth hormone deficiency, isolated partial [OMIM:615925]), <i>SPATA16</i> [OMIM:609856] (spermatogenic failure 6 [OMIM:102530])                                                                                                                                                                                                                                                                                                                                                                                                                                                 |
| 4q34.3q35.1  | —                                                                                                                                                                                                                                                                                                                                                                                                                                                                                                                                                                                                                                  | <i>TENM3</i> [OMIM:610083] (microphthalmia, isolated, with coloboma 9 [OMIM:615145])<br><i>PROP1</i> [OMIM:601538] (pituitary hormone deficiency, combined, 2), <i>NOLA2</i> [OMIM:606470] (dyskeratosis congenita, autosomal recessive 2), <i>HNRNPAB</i> [OMIM:602688], <i>AGXT2L2</i> [OMIM:614683] (phosphohydroxylysineuria [OMIM:615011]), <i>GRM6</i> [OMIM:604096] (night blindness, congenital stationary (complete), 1B, autosomal recessive [OMIM:257270]), <i>ADAMTS2</i> [OMIM:604539] (Ehlers-Danlos syndrome, type VIIC [OMIM: 225410]), <i>LTC4S</i> [OMIM:246530] (leukotriene C4 synthase |
| 5q35.1q35.3  | <i>SH3PXD2B</i> [OMIM:613293] (Frank-ter Haar syndrome [OMIM: 249420]), <i>NKX2-5</i> [OMIM:600584] (atrial septal defect 7, with or without AV conduction defects [OMIM:108900], conotruncal heart malformations, variable [OMIM:217095], hypoplastic left heart syndrome 2 [OMIM:614435], hypothyroidism, congenital nongoitrous, 5 [OMIM:225250], tetralogy of Fallot [OMIM:187500], ventricular septal defect 3 [OMIM:614432]), <i>MSX2</i> [OMIM:123101] (craniosynostosis, type 2 [OMIM:604757], parietal foramina 1 [OMIM:168500], parietal foramina with cleidocranial dysplasia [OMIM:168550]), <i>DRD1</i> [OMIM:126449] |                                                                                                                                                                                                                                                                                                                                                                                                                                                                                                                                                                                                             |

---

|               |                                                                                 |                                                                                                                                                                                                                                                                                                                                                                                                                                                                                                                                                                                                                                                                                                                                                                                                                                                                                                                                                                                                                                                                                                                                                                                                                                                                               |
|---------------|---------------------------------------------------------------------------------|-------------------------------------------------------------------------------------------------------------------------------------------------------------------------------------------------------------------------------------------------------------------------------------------------------------------------------------------------------------------------------------------------------------------------------------------------------------------------------------------------------------------------------------------------------------------------------------------------------------------------------------------------------------------------------------------------------------------------------------------------------------------------------------------------------------------------------------------------------------------------------------------------------------------------------------------------------------------------------------------------------------------------------------------------------------------------------------------------------------------------------------------------------------------------------------------------------------------------------------------------------------------------------|
|               |                                                                                 | deficiency [OMIM:614037]),<br>SQSTM1 [OMIM:601530] (Paget<br>disease of bone [OMIM:602080]),<br>FLT4 [OMIM:136352]<br>(hemangioma, capillary<br>infantile, somatic<br>[OMIM:602089], lymphedema,<br>hereditary, IA [OMIM:153100])                                                                                                                                                                                                                                                                                                                                                                                                                                                                                                                                                                                                                                                                                                                                                                                                                                                                                                                                                                                                                                             |
| 7p22.1p15.2   | SNX10 [OMIM:614780] (osteopetrosis,<br>autosomal recessive 8 [OMIM:615085])     | —                                                                                                                                                                                                                                                                                                                                                                                                                                                                                                                                                                                                                                                                                                                                                                                                                                                                                                                                                                                                                                                                                                                                                                                                                                                                             |
| 7p22.2p21.3   | GLCCI1 [OMIM:614283] (glucocorticoid<br>therapy, response to) [OMIM:614400]),   | FAM20C [OMIM:611061] (Raine<br>syndrome [OMIM: 259775]),<br>HEATR2 [OMIM:614864](ciliary<br>dyskinesia, primary, 18<br>[OMIM:614874]), MAD1L1<br>[OMIM:602686](lymphoma,<br>somatic, prostate cancer, somatic<br>[OMIM:176807]), BRAT1<br>[OMIM:614506] (rigidity and<br>multifocal seizure syndrome,<br>lethal neonatal [OMIM:614498]),<br>CARD11 [OMIM:607210] (B-cell<br>expansion with NFkB and T-cell<br>anergy [OMIM:616452],<br>immunodeficiency 11A<br>[OMIM:615206],<br>immunodeficiency 11B with<br>atopic dermatitis<br>[OMIM:617638])<br>POR [OMIM:124015] (Antley-<br>Bixler syndrome with genital<br>anomalies and disordered<br>steroidogenesis [OMIM:201750],<br>disordered steroidogenesis due<br>to cytochrome P450<br>oxidoreductase [OMIM:613571]),<br>MDH2 [OMIM:154100] (epileptic<br>encephalopathy, early infantile,<br>51 [OMIM:617339]), HSPB1<br>[OMIM:602195] (Charcot-Marie-<br>Tooth disease, axonal, type 2F<br>[OMIM:606595], neuropathy,<br>distal hereditary motor, type IIB<br>[OMIM:608634]), YWHAG<br>[OMIM:605356] (epileptic<br>encephalopathy, early infantile,<br>56 [OMIM:617665]), SRCRB4D<br>[OMIM:607639], ZP3<br>[OMIM:182889] (oocyte<br>maturation defect 3 [OMIM:<br>17712]), PTPN12 [OMIM:600079]<br>(colon cancer, somatic |
| 7q11.22q21.11 | AUTS2 [OMIM:607270](mental retardation,<br>autosomal dominant 26 [OMIM:615834]) |                                                                                                                                                                                                                                                                                                                                                                                                                                                                                                                                                                                                                                                                                                                                                                                                                                                                                                                                                                                                                                                                                                                                                                                                                                                                               |

---

---

|              |                                                                                                                                                                                                                                                                                                                                                                                                                                                                                                                                                                                                                                                                                                                                                                                                                                                                                                                                                                                                                                                                                                                                                                                                                                                                                                                                                                                                                                                                                                                                                                                                                                                                                                                                                                                                                                                                                                                                                                                                                                                                                               |                                                                                                                                                                                                                           |
|--------------|-----------------------------------------------------------------------------------------------------------------------------------------------------------------------------------------------------------------------------------------------------------------------------------------------------------------------------------------------------------------------------------------------------------------------------------------------------------------------------------------------------------------------------------------------------------------------------------------------------------------------------------------------------------------------------------------------------------------------------------------------------------------------------------------------------------------------------------------------------------------------------------------------------------------------------------------------------------------------------------------------------------------------------------------------------------------------------------------------------------------------------------------------------------------------------------------------------------------------------------------------------------------------------------------------------------------------------------------------------------------------------------------------------------------------------------------------------------------------------------------------------------------------------------------------------------------------------------------------------------------------------------------------------------------------------------------------------------------------------------------------------------------------------------------------------------------------------------------------------------------------------------------------------------------------------------------------------------------------------------------------------------------------------------------------------------------------------------------------|---------------------------------------------------------------------------------------------------------------------------------------------------------------------------------------------------------------------------|
|              |                                                                                                                                                                                                                                                                                                                                                                                                                                                                                                                                                                                                                                                                                                                                                                                                                                                                                                                                                                                                                                                                                                                                                                                                                                                                                                                                                                                                                                                                                                                                                                                                                                                                                                                                                                                                                                                                                                                                                                                                                                                                                               | [OMIM:114500]), <i>MAGI2</i><br>[OMIM:606382] (nephrotic<br>syndrome 15 [OMIM:617609])                                                                                                                                    |
| 9p24.3p24.2  | <i>SMARCA2</i> [OMIM:600014] (Nicolaidis-<br>Baraitser syndrome [OMIM:601358]<br><i>POMT1</i> [OMIM:607423] (muscular<br>dystrophy-dystroglycanopathy (congenital<br>with brain and eye anomalies), type A,<br>1[OMIM:236670], muscular dystrophy-<br>dystroglycanopathy (congenital with mental<br>retardation), type B, 1 [OMIM:613155],<br>muscular dystrophy-dystroglycanopathy<br>(limb-girdle), type C, 1 [OMIM:609308]),<br><i>SETX</i> [OMIM:608465] (amyotrophic lateral<br>sclerosis 4, juvenile [OMIM:602433],<br>spinocerebellar ataxia, autosomal recessive 1<br>[OMIM:606002]), <i>TSC1</i> [OMIM:605284]<br>(focal cortical dysplasia, Taylor balloon cell<br>type [OMIM:607341],<br>lymphangi leiomyomatosis<br>[OMIM:606690], tuberous sclerosis-1<br>[OMIM:191100]), <i>GFI1B</i> [OMIM:604383]<br>(bleeding disorder, platelet-type, 17<br>[OMIM:187900]), <i>CEL</i> [OMIM:114840]<br>(maturity-onset diabetes of the young, type<br>VIII [OMIM:609812]), <i>SURF1</i><br>[OMIM:185620] (Leigh syndrome, due to<br>COX deficiency [OMIM:256000]),<br><i>ADAMTS13</i> [OMIM:604134] (thrombotic<br>thrombocytopenic purpura, familial<br>[OMIM:274150]), <i>ADAMTSL2</i><br>[OMIM:612277] (geleophysic dysplasia 1<br>[OMIM:231050]), <i>DBH</i> [OMIM:609312]<br>(dopamine beta-hydroxylase deficiency<br>[OMIM:223360], dopamine-beta-<br>hydroxylase activity levels, plasma),<br><i>SARDH</i> [OMIM:604455] (sarcosinemia<br>[OMIM:268900]), <i>COL5A1</i> [OMIM:120215]<br>(Ehlers-Danlos syndrome, classic type<br>[OMIM:130000]), <i>KCNT1</i> [OMIM:608167]<br>(epilepsy, nocturnal frontal lobe, 5<br>[OMIM:615005], epileptic encephalopathy,<br>early infantile, 14 [OMIM:614959])<br><i>TSC1</i> [OMIM:605284] (focal cortical<br>dysplasia, type II, somatic [OMIM:607341],<br>lymphangi leiomyomatosis<br>[OMIM:606690], tuberous sclerosis-1<br>[OMIM:191100]), <i>CEL</i> [OMIM:114840]<br>(maturity-onset diabetes of the young, type<br>VIII [OMIM:609812]), <i>SURF1</i><br>[OMIM:185620] (Charcot-Marie-Tooth<br>disease, type 4K [OMIM:616684], Leigh | —                                                                                                                                                                                                                         |
| 9q34.13q34.3 |                                                                                                                                                                                                                                                                                                                                                                                                                                                                                                                                                                                                                                                                                                                                                                                                                                                                                                                                                                                                                                                                                                                                                                                                                                                                                                                                                                                                                                                                                                                                                                                                                                                                                                                                                                                                                                                                                                                                                                                                                                                                                               | <i>NOTCH1</i> [OMIM:190198]<br>(Adams-Oliver syndrome 5<br>[OMIM:616028], aortic valve<br>disease 1 [OMIM:109730]),<br><i>AGPAT2</i> [OMIM:603100]<br>(lipodystrophy, congenital<br>generalized, type 1<br>[OMIM:608594]) |
| 9q34.13q34.3 |                                                                                                                                                                                                                                                                                                                                                                                                                                                                                                                                                                                                                                                                                                                                                                                                                                                                                                                                                                                                                                                                                                                                                                                                                                                                                                                                                                                                                                                                                                                                                                                                                                                                                                                                                                                                                                                                                                                                                                                                                                                                                               |                                                                                                                                                                                                                           |

---

|             |                                                                                                                                                                                                                                                                                                                                                                                                                                                                                                                                                                                                                                                                                                                                                                                                                                                                                                                                                                                                                                                                                                                                                                                                                                                                                                                                                                                                                                                                  |                                                                                                                                                                                                                                                                                                                      |
|-------------|------------------------------------------------------------------------------------------------------------------------------------------------------------------------------------------------------------------------------------------------------------------------------------------------------------------------------------------------------------------------------------------------------------------------------------------------------------------------------------------------------------------------------------------------------------------------------------------------------------------------------------------------------------------------------------------------------------------------------------------------------------------------------------------------------------------------------------------------------------------------------------------------------------------------------------------------------------------------------------------------------------------------------------------------------------------------------------------------------------------------------------------------------------------------------------------------------------------------------------------------------------------------------------------------------------------------------------------------------------------------------------------------------------------------------------------------------------------|----------------------------------------------------------------------------------------------------------------------------------------------------------------------------------------------------------------------------------------------------------------------------------------------------------------------|
|             | <p>syndrome, due to COX IV deficiency [OMIM:256000]), <i>ADAMTS13</i> [OMIM:604134] (thrombotic thrombocytopenic purpura, familial [OMIM:274150]), <i>ADAMTSL2</i> [OMIM:612277] (geleophysic dysplasia 1 [OMIM:231050]), <i>DBH</i> [OMIM:609312] (orthostatic hypotension 1, due to DBH deficiency [OMIM:223360]), <i>SARDH</i> [OMIM:604455] ([sarcosinemia] [OMIM:268900]), <i>COL5A1</i> [OMIM:120215] (Ehlers-Danlos syndrome, classic type, 1 [OMIM:130000]), <i>MRPS2</i> [OMIM:611971] (combined oxidative phosphorylation deficiency 36) [OMIM:617950], <i>SOHLH1</i> [OMIM:610224] (ovarian dysgenesis 5 [OMIM:617690], spermatogenic failure 32 [OMIM:618115]), <i>KCNT1</i> [OMIM:608167] (epilepsy, nocturnal frontal lobe, 5 [OMIM:615005], epileptic encephalopathy, early infantile, 14 [OMIM:614959]), <i>LHX3</i> [OMIM:600577] (pituitary hormone deficiency, combined, 3 [OMIM:221750]), <i>CARD9</i> [OMIM:607212] (candidiasis, familial, 2, autosomal recessive [OMIM:212050]), <i>PMPCA</i> [OMIM:613036] (spinocerebellar ataxia, autosomal recessive 2 [OMIM:213200]), <i>INPP5E</i> [OMIM:613037] (Joubert syndrome 1 [OMIM:213300], mental retardation, truncal obesity, retinal dystrophy, and micropenis [OMIM:610156]), <i>NOTCH1</i> [OMIM:190198] (Adams-Oliver syndrome 5 [OMIM:616028], aortic valve disease 1 [OMIM:109730]), <i>AGPAT2</i> [OMIM:603100] (lipodystrophy, congenital generalized, type 1 [OMIM:608594])</p> |                                                                                                                                                                                                                                                                                                                      |
| 12q24.33    | —                                                                                                                                                                                                                                                                                                                                                                                                                                                                                                                                                                                                                                                                                                                                                                                                                                                                                                                                                                                                                                                                                                                                                                                                                                                                                                                                                                                                                                                                | <p><i>PUS1</i> [OMIM:608109] (mitochondrial myopathy and sideroblastic anemia 1), <i>P2RX2</i> [OMIM:600844] (deafness, autosomal dominant 41 [OMIM:608224]), <i>POLE</i> [OMIM:174762] (FILS syndrome [OMIM:615139], ), IMAGE-I syndrome [OMIM:618336], colorectal cancer, susceptibility to, 12 [OMIM:615083])</p> |
| 13q11q12.11 | <p><i>GJA3</i> [OMIM:121015] (cataract 14, multiple types [OMIM:601885]), <i>GJB2</i> [OMIM:121011] (Bart-Pumphrey syndrome [OMIM:149200], 3 Deafness, autosomal dominant 3A [OMIM:601544], Deafness, autosomal</p>                                                                                                                                                                                                                                                                                                                                                                                                                                                                                                                                                                                                                                                                                                                                                                                                                                                                                                                                                                                                                                                                                                                                                                                                                                              | <p><i>FGF9</i> [OMIM:600921] (multiple synostoses syndrome 3 [OMIM:612961])</p>                                                                                                                                                                                                                                      |

|            |                                                                                       |                                                                                                                                                                                                                                                                                                                                                                                                                                                                                                                                                                                                                                                                                                                                                                                                                                                                                                                                                                                                                                     |   |
|------------|---------------------------------------------------------------------------------------|-------------------------------------------------------------------------------------------------------------------------------------------------------------------------------------------------------------------------------------------------------------------------------------------------------------------------------------------------------------------------------------------------------------------------------------------------------------------------------------------------------------------------------------------------------------------------------------------------------------------------------------------------------------------------------------------------------------------------------------------------------------------------------------------------------------------------------------------------------------------------------------------------------------------------------------------------------------------------------------------------------------------------------------|---|
|            |                                                                                       | recessive 1A [OMIM:220290], Hystrix-like ichthyosis with deafness [OMIM:602540], Keratitis-ichthyosis-deafness syndrome [OMIM:148210], Keratoderma, palmoplantar, with deafness [OMIM:148350], Vohwinkel syndrome [OMIM:124500]), <i>GJB6</i> [OMIM:604418] (deafness, autosomal dominant 3B [OMIM:612643], deafness, autosomal recessive 1B [OMIM:612645], deafness, digenic GJB2/GJB6 [OMIM:220290], ectodermal dysplasia 2, Clouston type [OMIM:129500]) <i>COL4A2</i> [OMIM:120090](porencephaly 2 [OMIM:614483], hemorrhage, intracerebral, susceptibility to [OMIM:614519]), <i>CARS2</i> [OMIM:612800](combined oxidative phosphorylation deficiency 27 [OMIM:616672]), <i>ING1</i> [OMIM:601566](squamous cell carcinoma, head and neck, somatic [OMIM:275355]), <i>F7</i> [OMIM:613878](factor VII deficiency [OMIM:227500], myocardial infarction, decreased susceptibility to [OMIM:608446]), <i>F10</i> [OMIM:613872](factor X deficiency [OMIM:227600]), <i>PROZ</i> [OMIM:176895](protein Z deficiency [OMIM:614024]) |   |
| 13q34      |                                                                                       |                                                                                                                                                                                                                                                                                                                                                                                                                                                                                                                                                                                                                                                                                                                                                                                                                                                                                                                                                                                                                                     | — |
| 15q11.2    |                                                                                       |                                                                                                                                                                                                                                                                                                                                                                                                                                                                                                                                                                                                                                                                                                                                                                                                                                                                                                                                                                                                                                     | — |
| 15q11.2    |                                                                                       |                                                                                                                                                                                                                                                                                                                                                                                                                                                                                                                                                                                                                                                                                                                                                                                                                                                                                                                                                                                                                                     | — |
| 15q13.1q14 | <i>HERC2</i> [OMIM:605837] (mental retardation, autosomal recessive 38 [OMIM:615516], | <i>NIPA1</i> [OMIM:608145] (spastic paraplegia 6, autosomal dominant [OMIM:600363]), <i>MKRN3</i> [OMIM:603856] (precocious puberty, central, 2 [OMIM:615346]), <i>MAGEL2</i> [OMIM:605283] (Prader-Willi-like syndrome [OMIM:615547]), <i>NDN</i> [OMIM:602117] (Prader-Willi syndrome [OMIM:176270]), <i>SNRPN</i> [OMIM:182279] (Prader-Willi syndrome [OMIM:176270]) <i>MKRN3</i> [OMIM:603856] (precocious puberty, central, 2 [OMIM:615346]), <i>MAGEL2</i> [OMIM:605283] (Schaaf-Yang syndrome [OMIM:615547]), <i>NDN</i> [OMIM:602117] (Prader-Willi syndrome [OMIM:176270]), <i>SNRPN</i> [OMIM:182279] (Prader-Willi syndrome [OMIM:176270]) <i>SLC12A6</i> [OMIM:604878] (agenesis of the corpus callosum                                                                                                                                                                                                                                                                                                                |   |

|              |                                                                                                                                                                                                                                                                                                                                                                            |  |                                                                                                                                                                                                                                                                                                                                                                                                                                                                                                                                                                                                                                                                                                                                                                                                                                                                                                                                                                                                                                                                                                                                                                                                                                                                                                                                                                                                                                            |
|--------------|----------------------------------------------------------------------------------------------------------------------------------------------------------------------------------------------------------------------------------------------------------------------------------------------------------------------------------------------------------------------------|--|--------------------------------------------------------------------------------------------------------------------------------------------------------------------------------------------------------------------------------------------------------------------------------------------------------------------------------------------------------------------------------------------------------------------------------------------------------------------------------------------------------------------------------------------------------------------------------------------------------------------------------------------------------------------------------------------------------------------------------------------------------------------------------------------------------------------------------------------------------------------------------------------------------------------------------------------------------------------------------------------------------------------------------------------------------------------------------------------------------------------------------------------------------------------------------------------------------------------------------------------------------------------------------------------------------------------------------------------------------------------------------------------------------------------------------------------|
|              | skin/hair/eye pigmentation 1, blond/brown hair [OMIM:227220], skin/hair/eye pigmentation 1, blue/nonblue eyes [OMIM:227220])                                                                                                                                                                                                                                               |  | with peripheral neuropathy [OMIM:218000]), <i>NOP10</i> [OMIM:606471] (dyskeratosis congenita, autosomal recessive 1 [OMIM:606471]), <i>ACTC1</i> [OMIM:102540] (atrial septal defect 5 [OMIM:612794], cardiomyopathy, dilated, 1R [OMIM:613424], cardiomyopathy, familial hypertrophic, 11 [OMIM:612098], left ventricular noncompaction 4 [OMIM:613424]) <i>VPS35</i> [OMIM:601501] (Parkinson disease 17 [OMIM:614203]), <i>ORC6</i> [OMIM:607213] (Meier-Gorlin syndrome 3 [OMIM:613803]), <i>GPT2</i> [OMIM:138210] (mental retardation, autosomal recessive 49 [OMIM:616281]), <i>PHKB</i> [OMIM:172490] (phosphorylase kinase deficiency of liver and muscle, autosomal recessive [OMIM:261750]), <i>ZNF423</i> [OMIM:604557] (Joubert syndrome 19 [OMIM:614844], nephronophthisis 14 [OMIM:614844]), <i>NOD2</i> [OMIM:605956] (Blau syndrome [OMIM:186580], sarcoidosis, early-onset [OMIM:609464], inflammatory bowel disease 1 [OMIM:266600], psoriatic arthritis, susceptibility to [OMIM:607507]), <i>CYLD</i> [OMIM:605018] (Brooke-Spiegler syndrome [OMIM:605041]; cylindromatosis, familial [OMIM:605018], trichoepithelioma, multiple familial, 1 [OMIM:601606]) <i>WWOX</i> [OMIM:605131] (epileptic encephalopathy, early infantile, 28 [OMIM:616211], esophageal squamous cell carcinoma, somatic [OMIM:133239], spinocerebellar ataxia, autosomal recessive 12 [OMIM: 614322]), <i>MAF</i> [OMIM:177075] (Ayme-Gripp |
| 16p11.2q12.1 | —                                                                                                                                                                                                                                                                                                                                                                          |  |                                                                                                                                                                                                                                                                                                                                                                                                                                                                                                                                                                                                                                                                                                                                                                                                                                                                                                                                                                                                                                                                                                                                                                                                                                                                                                                                                                                                                                            |
| 16q22.3q23.3 | <i>FA2H</i> [OMIM:611026] (spastic paraplegia 35, autosomal recessive [OMIM:612319]), <i>CHST6</i> [OMIM:605294] (macular corneal dystrophy [OMIM:217800]), <i>TMEM231</i> [OMIM:614949] (Joubert syndrome 20 [OMIM:614970], Meckel syndrome 11 [OMIM:615397]), <i>KARS</i> [OMIM:601421] (Charcot-Marie-Tooth disease, recessive intermediate, B [OMIM:613641], deafness, |  |                                                                                                                                                                                                                                                                                                                                                                                                                                                                                                                                                                                                                                                                                                                                                                                                                                                                                                                                                                                                                                                                                                                                                                                                                                                                                                                                                                                                                                            |



|              |                                                                                                                                                                                                                                                                                                                                                                                                                                                                                                                                                                                                                                                                                                                                                                                                                                                                                                                                                                                                                                                                                                                                                                                                                                                                                                                                                                                                                                                                                                                                                                                                                                                                                                                                                                                                                                                                                                                                                                                 |                                                                                                                                             |
|--------------|---------------------------------------------------------------------------------------------------------------------------------------------------------------------------------------------------------------------------------------------------------------------------------------------------------------------------------------------------------------------------------------------------------------------------------------------------------------------------------------------------------------------------------------------------------------------------------------------------------------------------------------------------------------------------------------------------------------------------------------------------------------------------------------------------------------------------------------------------------------------------------------------------------------------------------------------------------------------------------------------------------------------------------------------------------------------------------------------------------------------------------------------------------------------------------------------------------------------------------------------------------------------------------------------------------------------------------------------------------------------------------------------------------------------------------------------------------------------------------------------------------------------------------------------------------------------------------------------------------------------------------------------------------------------------------------------------------------------------------------------------------------------------------------------------------------------------------------------------------------------------------------------------------------------------------------------------------------------------------|---------------------------------------------------------------------------------------------------------------------------------------------|
|              | <p>autosomal recessive 89 [OMIM:613916]), <i>ADAMTS18</i> [OMIM:607512] (microcornea, myopic chorioretinal atrophy, and telecanthus [OMIM:615458])</p> <p><i>FBXO31</i> [OMIM:609102] (?mental retardation, autosomal recessive 45 [OMIM:615979]), <i>JPH3</i> [OMIM:605268] (Huntington disease-like 2 [OMIM:606438]), <i>CA5A</i> [OMIM:114761] (hyperammonemia due to carbonic anhydrase VA deficiency [OMIM:615751]), <i>ZNF469</i> [OMIM:612078] (Brittle cornea syndrome 1 [OMIM:229200]), <i>CYBA</i> [OMIM:608508] (chronic granulomatous disease, autosomal, due to deficiency of <i>CYBA</i> [OMIM:233690]), <i>MVD</i> [OMIM:603236] (porokeratosis 7, multiple types [OMIM:614714]), <i>PIZO1</i> [OMIM:611184] (dehydrated hereditary stomatocytosis with or without pseudohyperkalemia and/or perinatal edema [OMIM:194380], lymphatic malformation 6 [OMIM:616843]), <i>CDT1</i> [OMIM:605525] (Meier-Gorlin syndrome 4 [OMIM:613804]), <i>APRT</i> [OMIM:102600] (adenine phosphoribosyltransferase deficiency [OMIM:614723]), <i>GALNS</i> [OMIM:612222] (mucopolysaccharidosis IVA [OMIM:253000]), <i>ACSF3</i> [OMIM:614245] (combined malonic and methylmalonic aciduria [OMIM:614265]), <i>CDH15</i> [OMIM:114019] (mental retardation, autosomal dominant 3 [OMIM:612580]), <i>ANKRD11</i> [OMIM:611192] (KBG syndrome [OMIM:148050]), <i>SPG7</i> [OMIM:602783] (spastic paraplegia 7, autosomal recessive [OMIM:607259])</p> <p><i>WDR81</i> [OMIM:614218] (cerebellar ataxia, mental retardation, and dysequilibrium syndrome 2 [OMIM:610185]), <i>SERPINF2</i> [OMIM:613168] (alpha-2-plasmin inhibitor deficiency [OMIM:262850]), <i>SERPINF1</i> [OMIM:172860] (osteogenesis imperfecta, type VI [OMIM:613982]), <i>PAFAH1B1</i> [OMIM:601545] (lissencephaly 1 [OMIM:607432], subcortical laminar heterotopia [OMIM:607432]), <i>ASPA</i> [OMIM:608034] (Canavan disease [OMIM:271900]), <i>TRPV3</i> [OMIM:607066] (palmoplantar keratoderma,</p> | <p>syndrome [OMIM:601088], cataract 21, multiple types [OMIM:610202]), <i>GCSH</i> [OMIM:238330] (glycine encephalopathy [OMIM:605899])</p> |
| 16q24.2q24.3 |                                                                                                                                                                                                                                                                                                                                                                                                                                                                                                                                                                                                                                                                                                                                                                                                                                                                                                                                                                                                                                                                                                                                                                                                                                                                                                                                                                                                                                                                                                                                                                                                                                                                                                                                                                                                                                                                                                                                                                                 | —                                                                                                                                           |
| 17p13.3p13.2 |                                                                                                                                                                                                                                                                                                                                                                                                                                                                                                                                                                                                                                                                                                                                                                                                                                                                                                                                                                                                                                                                                                                                                                                                                                                                                                                                                                                                                                                                                                                                                                                                                                                                                                                                                                                                                                                                                                                                                                                 |                                                                                                                                             |

---

|              |                                                                                                                                                                                                                                                                                                                                                                                                                                                                                                                                                                                                                                                                                                                                                                                                                                                                                                                                                                                                                                                                                                                                                                                                                                                                                                                                                                                                                                                                                                                                                                                                                                                                                                                                                                                                                                                                                                                                                                                                                                                                                                                                                                                                                                                                                                                                                                                                                           |                                                                                                                                                                                                                                                                                                                                                             |
|--------------|---------------------------------------------------------------------------------------------------------------------------------------------------------------------------------------------------------------------------------------------------------------------------------------------------------------------------------------------------------------------------------------------------------------------------------------------------------------------------------------------------------------------------------------------------------------------------------------------------------------------------------------------------------------------------------------------------------------------------------------------------------------------------------------------------------------------------------------------------------------------------------------------------------------------------------------------------------------------------------------------------------------------------------------------------------------------------------------------------------------------------------------------------------------------------------------------------------------------------------------------------------------------------------------------------------------------------------------------------------------------------------------------------------------------------------------------------------------------------------------------------------------------------------------------------------------------------------------------------------------------------------------------------------------------------------------------------------------------------------------------------------------------------------------------------------------------------------------------------------------------------------------------------------------------------------------------------------------------------------------------------------------------------------------------------------------------------------------------------------------------------------------------------------------------------------------------------------------------------------------------------------------------------------------------------------------------------------------------------------------------------------------------------------------------------|-------------------------------------------------------------------------------------------------------------------------------------------------------------------------------------------------------------------------------------------------------------------------------------------------------------------------------------------------------------|
|              | <p>nonepidermolytic, focal 2 [OMIM:616400],<br/> Olmsted syndrome [OMIM:614594]), <i>TRPV1</i><br/> [OMIM:602076], <i>CTNS</i><br/> [OMIM:606272](cystinosis, atypical<br/> nephropathic [OMIM:219800], cystinosis,<br/> late-onset juvenile or adolescent<br/> nephropathic [OMIM:219900], cystinosis,<br/> nephropathic [OMIM:219800], cystinosis,<br/> ocular nonnephropathic [OMIM:219750]),<br/> <i>P2RX1</i> [OMIM:600845](bleeding disorder,<br/> platelet-type [OMIM:609821], bleeding<br/> disorder due to <i>P2RX1</i> defect, somatic<br/> [OMIM:609821])<br/> <i>MYH8</i> [OMIM:160741] (Carney complex<br/> variant [OMIM:608837], Trismus-<br/> pseudocamptodactyly syndrome<br/> [OMIM:158300]), <i>MYH2</i> [OMIM:160740]<br/> (proximal myopathy and ophthalmoplegia<br/> [OMIM:605637]), <i>MYH3</i> [OMIM:160720]<br/> (arthrogryposis, distal, type 2A<br/> [OMIM:193700], arthrogryposis, distal, type<br/> 2B [OMIM:601680]), <i>SCO1</i> [OMIM:603644]<br/> (hepatic failure, early onset, and neurologic<br/> disorder), <i>COX10</i> [OMIM:602125] (Leigh<br/> syndrome due to mitochondrial <i>COX4</i><br/> deficiency [OMIM:256000], mitochondrial<br/> complex IV deficiency [OMIM:220110])<br/> <i>CCDC40</i> [OMIM:613799] (ciliary dyskinesia,<br/> primary, 15 [OMIM:613808]), <i>GAA</i><br/> [OMIM:606800] (glycogen storage disease II<br/> [OMIM:232300]), <i>EIF4A3</i> [OMIM:608546]<br/> (Robin sequence with cleft mandible and<br/> limb anomalies [OMIM:268305]), <i>CARD14</i><br/> [OMIM:607211] (pityriasis rubra pilaris<br/> [OMIM:173200], psoriasis 2<br/> [OMIM:602723]), <i>SGSH</i> [OMIM:605270]<br/> (mucopolysaccharidosis type IIIA<br/> (Sanfilippo A) [OMIM:252900]), <i>ACTG1</i><br/> [OMIM:102560] (Baraitser-Winter syndrome<br/> 2 [OMIM:614583], deafness, autosomal<br/> dominant 20/26 [OMIM:604717]), <i>FSCN2</i><br/> [OMIM:607643] (retinitis pigmentosa 30<br/> [OMIM:607921]), <i>PDE6G</i> [OMIM:180073]<br/> (retinitis pigmentosa 57 [OMIM:613582]),<br/> <i>GCGR</i> [OMIM:138033]({diabetes mellitus,<br/> noninsulin-dependent} [OMIM:125853]),<br/> <i>P4HB</i> [OMIM:176790] (Cole-Carpenter<br/> syndrome 1 [OMIM:112240]), <i>ARHGDI1</i><br/> [OMIM:601925] (nephrotic syndrome, type 8<br/> [OMIM:615244]), <i>PYCR1</i> [OMIM:179035]<br/> (cutis laxa, autosomal recessive, type IIB<br/> [OMIM:612940], cutis laxa, autosomal</p> |                                                                                                                                                                                                                                                                                                                                                             |
| 17p13.1p11.2 |                                                                                                                                                                                                                                                                                                                                                                                                                                                                                                                                                                                                                                                                                                                                                                                                                                                                                                                                                                                                                                                                                                                                                                                                                                                                                                                                                                                                                                                                                                                                                                                                                                                                                                                                                                                                                                                                                                                                                                                                                                                                                                                                                                                                                                                                                                                                                                                                                           | <p><i>TTC19</i> [OMIM:613814]<br/> (mitochondrial complex III<br/> deficiency, nuclear type 2<br/> [OMIM:615157]), <i>CPI</i><br/> [OMIM:119540] (cleft palate,<br/> isolated [OMIM:119540]),<br/> <i>TNFRSF13B</i> [OMIM:604907]<br/> (immunodeficiency, common<br/> variable, 2 [OMIM:240500],<br/> immunoglobulin A deficiency 2<br/> [OMIM:609529])</p> |
| 17q25.3      |                                                                                                                                                                                                                                                                                                                                                                                                                                                                                                                                                                                                                                                                                                                                                                                                                                                                                                                                                                                                                                                                                                                                                                                                                                                                                                                                                                                                                                                                                                                                                                                                                                                                                                                                                                                                                                                                                                                                                                                                                                                                                                                                                                                                                                                                                                                                                                                                                           |                                                                                                                                                                                                                                                                                                                                                             |

---

|               |                                                                                                                                                                                                                                                                                                                                                                                                                                                                                                                                                                                                                                                                                                                                                                                                                                                                                                                                                        |                                                                                                                                                                                                                                                                                                                                                                                                                                                                                                                                          |
|---------------|--------------------------------------------------------------------------------------------------------------------------------------------------------------------------------------------------------------------------------------------------------------------------------------------------------------------------------------------------------------------------------------------------------------------------------------------------------------------------------------------------------------------------------------------------------------------------------------------------------------------------------------------------------------------------------------------------------------------------------------------------------------------------------------------------------------------------------------------------------------------------------------------------------------------------------------------------------|------------------------------------------------------------------------------------------------------------------------------------------------------------------------------------------------------------------------------------------------------------------------------------------------------------------------------------------------------------------------------------------------------------------------------------------------------------------------------------------------------------------------------------------|
|               | <p>recessive, type IIIB [OMIM:614438]), <i>ASPSCR1</i> [OMIM:606236] (alveolar soft-part sarcoma [OMIM:606243]), <i>DCXR</i> [OMIM:608347] ([pentosuria] [OMIM:260800]) <i>CSNK1D</i> [OMIM:600864] (advanced sleep-phase syndrome, familial, 2 [OMIM:615224])</p>                                                                                                                                                                                                                                                                                                                                                                                                                                                                                                                                                                                                                                                                                     |                                                                                                                                                                                                                                                                                                                                                                                                                                                                                                                                          |
| 22q11.1q11.21 | <p><i>IL17RA</i> [OMIM:605461] (candidiasis, familial, 5, autosomal recessive [OMIM:613953]), <i>CECR2</i> [OMIM:607576], <i>CECR1</i> [OMIM:607575] (Sneddon syndrome [OMIM:182410], polyarteritis nodosa, childhood-onset [OMIM:615688]), <i>PEX26</i> [OMIM:608666] (peroxisome biogenesis disorder 7A (Zellweger) [OMIM:614872], peroxisome biogenesis disorder 7B [OMIM:614873]), <i>TUBA8</i> [OMIM:605742] (polymicrogyria with optic nerve hypoplasia [OMIM:613180])</p>                                                                                                                                                                                                                                                                                                                                                                                                                                                                       | <p>SCARF2 [OMIM:613619] (Van den Ende-Gupta syndrome [OMIM:600920]), PI4KA [OMIM:600286] (polymicrogyria, perisylvian, with cerebellar hypoplasia and arthrogryposis [OMIM:616531]), HCF2 [OMIM:142360] (thrombophilia due to heparin cofactor II deficiency [OMIM:612356]), SNAP29 [OMIM:604202] (cerebral dysgenesis, neuropathy, ichthyosis, and palmoplantar keratoderma syndrome [OMIM:609528]), CRKL [OMIM:602007], LZTR1 [OMIM:600574] (Noonan syndrome 10 [OMIM:616564], schwannomatosis-2, susceptibility to [OMIM:615670])</p> |
| 22q11.1q11.22 | <p><i>IL17RA</i> [OMIM:605461] (candidiasis, familial, 5, autosomal recessive [OMIM:613953]), <i>CECR1</i> [OMIM:607575] (Sneddon syndrome recessive [OMIM:182410], polyarteritis nodosa, childhood-onset [OMIM:615688]), <i>PEX26</i> [OMIM:608666] (peroxisome biogenesis disorder 7A (Zellweger) [OMIM:614872], peroxisome biogenesis disorder 7B [OMIM:614873]), <i>TUBA8</i> [OMIM:605742] (polymicrogyria with optic nerve hypoplasia [OMIM:613180]), <i>PRODH</i> [OMIM:606810] (hyperprolinemia, type I [OMIM:239500]), schizophrenia, susceptibility to, 4 [OMIM:600850]), <i>XKR3</i> [OMIM:611674], <i>IL17RA</i> [OMIM:605461] (immunodeficiency 51 [OMIM:613953]), <i>CECR1</i> [OMIM:607575] (?Sneddon syndrome [OMIM:182410], polyarteritis nodosa, childhood-onset [OMIM:615688]), <i>CECR2</i> [OMIM:607576], <i>ATP6V1E1</i> [OMIM:108746] (cutis laxa, autosomal recessive, type IIC [OMIM:617402]), <i>PEX26</i> [OMIM:608666]</p> | <p>RSPH14 [OMIM:605663], (Noonan syndrome 10 [OMIM:616564], schwannomatosis-2, susceptibility to [OMIM:615670], tetralogy of fallot [OMIM:187500], velocardiofacial syndrome [OMIM:192430])</p>                                                                                                                                                                                                                                                                                                                                          |
| 22q11.1q11.23 |                                                                                                                                                                                                                                                                                                                                                                                                                                                                                                                                                                                                                                                                                                                                                                                                                                                                                                                                                        | —                                                                                                                                                                                                                                                                                                                                                                                                                                                                                                                                        |

---

|              |                                                                                                                                                                                                                           |                                                                                                                                                                                                                                                                                                                                                                                                                                                                                                                                                                                                                                                                                                                                                                                                                                                                                          |
|--------------|---------------------------------------------------------------------------------------------------------------------------------------------------------------------------------------------------------------------------|------------------------------------------------------------------------------------------------------------------------------------------------------------------------------------------------------------------------------------------------------------------------------------------------------------------------------------------------------------------------------------------------------------------------------------------------------------------------------------------------------------------------------------------------------------------------------------------------------------------------------------------------------------------------------------------------------------------------------------------------------------------------------------------------------------------------------------------------------------------------------------------|
|              | (peroxisome biogenesis disorder 7A (Zellweger) [OMIM:614872], peroxisome biogenesis disorder 7B [OMIM: 614873]), <i>TUBA8</i> [OMIM:605742] (cortical dysplasia, complex, with other brain malformations 8 [OMIM:613180]) |                                                                                                                                                                                                                                                                                                                                                                                                                                                                                                                                                                                                                                                                                                                                                                                                                                                                                          |
| Xp22.32p22.2 | <i>KAL1</i> [OMIM:300836] (hypogonadotropic hypogonadism 1 with or without anosmia (Kallmann syndrome 1) [OMIM:308700]), <i>TBL1X</i> [OMIM:300196] (Hypothyroidism, congenital, nongoitrous, 8) [OMIM:301033]            | <i>NLGN4X</i> [OMIM:300427] (mental retardation, X-linked [OMIM:300495], Asperger syndrome susceptibility, X-linked 2 [OMIM:300497], autism susceptibility, X-linked 2 [OMIM:300495]), <i>XK</i> [OMIM:314850](McLeod syndrome with or without chronic granulomatous disease [OMIM:300842]), <i>CYBB</i> [OMIM:300481](chronic granulomatous disease, X-linked [OMIM:306400], immunodeficiency 34, mycobacteriosis, X-linked [OMIM:300645]), <i>RPGR</i> [OMIM:312610](cone-rod dystrophy, X-linked, 1 [OMIM:304020], macular degeneration, X-linked atrophic [OMIM:300834], retinitis pigmentosa 3 [OMIM: 300029], retinitis pigmentosa, X-linked, and sinorespiratory infections, with or without deafness [OMIM:300455]), <i>OTC</i> [OMIM:300461](ornithine transcarbamylase deficiency [OMIM: 311250]), <i>TSPAN7</i> [OMIM:300096] (mental retardation, X-linked 58 [OMIM:300210]) |
| Xp21.1p11.4  | <i>DMD</i> [OMIM:300377](Becker muscular dystrophy [OMIM:300376], cardiomyopathy, dilated, 3B [OMIM:302045], Duchenne muscular dystrophy [OMIM:310200])                                                                   |                                                                                                                                                                                                                                                                                                                                                                                                                                                                                                                                                                                                                                                                                                                                                                                                                                                                                          |

---
